# Supplementary material
Source: publisher figshare collection journal article supplement (https://sage.figshare.com/ndownloader/files/21301134)
Supplement: Supplementary file 1 [file 21301134]

## Sheet: Sheet1
NO.	Subjects (CRA cases=1, Controls=0)	14C urea breath test (dpm/mmol)	Hp status (positive=1, negative=0)	A
1	1	112	1
2	1	34	0
3	1	567	1
4	1	45	0
5	1	0	0
6	1	22	0
7	1	345	1
8	1	231	1
9	1	148	1
10	1	12	0
11	1	456	1
12	1	324	1
13	1	23	0
14	1	432	1
15	1	35	0
16	1	154	1
17	1	234	1
18	1	36	0
19	1	42	0
20	1	758	1
21	1	256	1
22	1	321	1
23	1	0	0
24	1	145	1
25	1	651	1
26	1	145	1
27	1	33	0
28	1	21	0
29	1	432	1
30	1	342	1
31	1	14	0
32	1	35	0
33	1	245	1
34	1	543	1
35	1	50	0
36	1	347	1
37	1	17	0
38	1	234	1
39	1	0	0
40	1	165	1
41	1	234	1
42	1	346	1
43	1	37	0
44	1	567	1
45	1	321	1
46	1	349	1
47	1	43	0
48	1	398	1
49	1	21	0
50	1	371	1
51	1	345	1
52	1	23	0
53	1	45	0
54	1	543	1
55	1	171	1
56	1	35	0
57	1	0	0
58	1	145	1
59	1	321	1
60	1	345	1
61	1	37	0
62	1	461	1
63	1	298	1
64	1	42	0
65	1	567	1
66	1	321	1
67	1	17	0
68	1	32	0
69	1	125	1
70	1	132	1
71	1	167	1
72	1	452	1
73	1	23	0
74	1	42	0
75	1	321	1
76	1	167	1
77	1	43	0
78	1	40	0
79	1	0	0
80	1	325	1
81	1	432	1
82	1	34	0
83	1	111	1
84	1	34	0
85	1	178	1
86	1	321	1
87	1	345	1
88	1	781	1
89	1	45	0
90	1	126	1
91	1	24	0
92	1	231	1
93	1	330	1
94	1	345	1
95	1	18	0
96	1	789	1
97	1	17	0
98	1	456	1
99	1	578	1
100	1	756	1
101	1	14	0
102	1	345	1
103	1	21	0
104	1	2	0
105	1	456	1
106	1	7	0
107	1	345	1
108	1	621	1
109	1	3	0
110	1	235	1
111	1	542	1
112	1	223	1
113	1	4	0
114	1	445	1
115	1	123	1
116	1	43	0
117	1	133	1
118	1	6	0
119	1	321	1
120	1	456	1
121	1	32	0
122	1	23	0
123	1	236	1
124	1	721	1
125	1	56	0
126	1	223	1
127	1	981	1
128	1	1120	1
129	1	25	0
130	1	23	0
131	1	4	0
132	1	50	0
133	1	32	0
134	1	25	0
135	1	67	0
136	1	456	1
137	1	78	0
138	1	342	1
139	1	3302	1
140	1	234	1
141	1	589	1
142	1	92	0
143	1	32	0
144	1	556	1
145	1	34	0
146	1	671	1
147	1	234	1
148	1	345	1
149	1	678	1
150	1	45	0
151	1	56	0
152	1	47	0
153	1	28	0
154	1	222	1
155	1	651	1
156	1	89	0
157	1	345	1
158	1	678	1
159	1	21	0
160	1	321	1
161	1	456	1
162	1	789	1
163	1	54	0
164	1	43	0
165	1	345	1
166	1	34	0
167	1	217	1
168	1	678	1
169	1	33	0
170	1	345	1
171	1	45	0
172	1	44	0
173	1	0	0
174	1	765	1
175	1	56	0
176	1	213	1
177	1	456	1
178	1	678	1
179	1	76	0
180	1	342	1
181	1	213	1
182	1	21	0
183	1	345	1
184	1	721	1
185	1	30	0
186	1	234	1
187	1	0	0
188	1	8	0
189	1	456	1
190	1	671	1
191	1	234	1
192	1	4	0
193	1	444	1
194	1	234	1
195	1	35	0
196	1	12	0
197	1	456	1
198	1	231	1
199	1	42	0
200	1	678	1
201	1	345	1
202	1	5	0
203	1	678	1
204	1	379	1
205	1	0	0
206	1	459	1
207	1	431	1
208	1	65	0
209	1	235	1
210	1	43	0
211	1	678	1
212	1	981	1
213	1	31	0
214	1	23	0
215	1	445	1
216	1	678	1
217	1	24	0
218	1	26	0
219	1	334	1
220	1	239	1
221	1	53	0
222	1	557	1
223	1	21	0
224	1	889	1
225	1	345	1
226	1	20	0
227	1	567	1
228	1	456	1
229	1	234	1
230	1	19	0
231	1	123	1
232	1	18	0
233	1	34	0
234	1	32	0
235	1	23	0
236	1	345	1
237	1	123	1
238	1	567	1
239	1	0	0
240	1	990	1
241	1	32	0
242	1	543	1
243	1	231	1
244	1	22	0
245	1	0	0
246	1	234	1
247	1	9	0
248	1	556	1
249	1	789	1
250	1	445	1
251	1	3	0
252	1	678	1
253	1	34	0
254	1	321	1
255	1	156	1
256	1	25	0
257	1	447	1
258	1	765	1
259	1	20	0
260	1	346	1
261	1	21	0
262	1	489	1
263	1	732	1
264	1	43	0
265	1	35	0
266	1	235	1
267	1	21	0
268	1	348	1
269	1	111	1
270	1	225	1
271	1	6	0
272	1	8	0
273	1	667	1
274	1	998	1
275	1	10	0
276	1	456	1
277	1	56	0
278	1	234	1
279	1	34	0
280	1	653	1
281	1	24	0
282	1	345	1
283	1	36	0
284	1	289	1
285	1	372	1
286	1	83	0
287	1	56	0
288	1	72	0
289	1	3	0
290	1	0	0
291	1	6	0
292	1	50	0
293	1	245	1
294	1	23	0
295	1	679	1
296	1	45	0
297	1	345	1
298	1	123	1
299	1	345	1
300	1	32	0
301	1	456	1
302	1	621	1
303	1	136	1
304	1	76	0
305	1	889	1
306	1	34	0
307	1	335	1
308	1	43	0
309	1	731	1
310	1	23	0
311	1	0	0
312	1	234	1
313	1	34	0
314	1	45	0
315	1	21	0
316	1	32	0
317	1	78	0
318	1	0	0
319	1	445	1
320	1	567	1
321	1	342	1
322	1	124	1
323	1	789	1
324	1	521	1
325	1	8	0
326	1	341	1
327	1	231	1
328	1	451	1
329	1	7	0
330	1	0	0
331	1	45	0
332	1	335	1
333	1	234	1
334	1	34	0
335	1	531	1
336	1	236	1
337	1	44	0
338	1	54	0
339	1	779	1
340	1	447	1
341	1	69	0
342	1	461	1
343	1	3	0
344	1	231	1
345	1	267	1
346	1	567	1
347	1	389	1
348	1	120	1
349	1	43	0
350	1	48	0
351	1	556	1
352	1	789	1
353	1	34	0
354	1	345	1
355	1	678	1
356	1	37	0
357	1	41	0
358	1	398	1
359	1	678	1
360	1	23	0
361	1	432	1
362	1	0	0
363	1	223	1
364	1	456	1
365	1	1	0
366	1	798	1
367	1	345	1
368	1	156	1
369	1	6	0
370	1	345	1
371	1	671	1
372	1	330	1
373	1	32	0
374	1	445	1
375	1	89	0
376	1	556	1
377	1	43	0
378	1	558	1
379	1	441	1
380	1	345	1
381	1	34	0
382	1	389	1
383	1	56	0
384	1	478	1
385	1	431	1
386	1	239	1
387	1	390	1
388	1	32	0
389	1	34	0
390	1	901	1
391	1	561	1
392	1	45	0
393	1	705	1
394	1	589	1
395	1	604	1
396	1	65	0
397	1	379	1
398	1	679	1
399	1	40	0
400	1	450	1
401	1	376	1
402	1	409	1
403	1	32	0
404	1	30	0
405	1	34	0
406	1	23	0
407	1	45	0
408	1	78	0
409	1	25	0
410	1	36	0
411	1	26	0
412	1	496	1
413	1	67	0
414	1	322	1
415	1	367	1
416	1	35	0
417	1	643	1
418	1	238	1
419	1	45	0
420	1	567	1
421	1	67	0
422	1	603	1
423	1	791	1
424	1	834	1
425	1	40	0
426	1	346	1
427	1	763	1
428	1	379	1
429	1	3	0
430	1	201	1
431	1	12	0
432	1	45	0
433	1	567	1
434	1	431	1
435	1	16	0
436	1	23	0
437	1	43	0
438	1	12	0
439	1	349	1
440	1	456	1
441	1	61	0
442	1	792	1
443	1	23	0
444	1	345	1
445	1	2	0
446	1	378	1
447	1	942	1
448	1	478	1
449	1	431	1
450	1	5	0
451	1	631	1
452	1	9	0
453	1	345	1
454	1	34	0
455	1	789	1
456	1	231	1
457	1	409	1
458	1	78	0
459	1	465	1
460	1	321	1
461	1	23	0
462	1	4	0
463	1	50	0
464	1	23	0
465	1	43	0
466	1	49	0
467	1	145	1
468	1	235	1
469	1	679	1
470	1	321	1
471	1	145	1
472	1	7	0
473	1	8	0
474	1	567	1
475	1	345	1
476	1	45	0
477	1	321	1
478	1	456	1
479	1	34	0
480	1	782	1
481	1	65	0
482	1	234	1
483	1	421	1
484	1	231	1
485	1	789	1
486	1	24	0
487	1	346	1
488	1	45	0
489	1	568	1
490	1	432	1
491	1	31	0
492	1	146	1
493	1	732	1
494	1	2	0
495	1	390	1
496	1	0	0
497	1	34	0
498	1	451	1
499	1	379	1
500	1	34	0
501	1	45	0
502	1	51	0
503	1	12	0
504	1	32	0
505	1	34	0
506	1	0	0
507	1	76	0
508	1	3	0
509	1	342	1
510	1	234	1
511	1	590	1
512	1	53	0
513	1	321	1
514	1	356	1
515	1	789	1
516	1	23	0
517	1	12	0
518	1	654	1
519	1	345	1
520	1	678	1
521	1	235	1
522	1	34	0
523	1	650	1
524	1	345	1
525	1	278	1
526	1	60	0
527	1	321	1
528	1	333	1
529	1	23	0
530	1	43	0
531	1	33	0
532	1	41	0
533	1	1	0
534	1	567	1
535	1	903	1
536	1	52	0
537	1	804	1
538	1	560	1
539	1	709	1
540	1	0	0
541	1	350	1
542	1	0	0
543	1	405	1
544	1	23	0
545	1	678	1
546	1	567	1
547	1	78	0
548	1	672	1
549	1	23	0
550	1	541	1
551	1	345	1
552	1	871	1
553	1	45	0
554	1	562	1
555	1	12	0
556	1	345	1
557	1	752	1
558	1	19	0
559	1	345	1
560	1	321	1
561	1	169	1
562	1	81	0
563	1	291	1
564	1	15	0
565	1	278	1
566	1	421	1
567	1	490	1
568	1	768	1
569	1	4	0
570	1	456	1
571	1	0	0
572	1	678	1
573	1	739	1
574	1	378	1
575	1	4	0
576	1	6	0
577	1	335	1
578	1	119	1
579	1	8	0
580	1	450	1
581	1	798	1
582	1	9	0
583	1	341	1
584	1	234	1
585	1	0	0
586	1	798	1
587	1	345	1
588	1	34	0
589	1	51	0
590	1	0	0
591	1	5	0
592	1	89	0
593	1	42	0
594	1	44	0
595	1	33	0
596	1	23	0
597	1	30	0
598	1	41	0
599	1	51	0
600	1	443	1
601	1	567	1
602	1	667	1
603	1	321	1
604	1	23	0
605	1	165	1
606	1	721	1
607	1	334	1
608	1	0	0
609	1	0	0
610	1	31	0
611	1	23	0
612	1	0	0
613	1	0	0
614	1	890	1
615	1	345	1
616	1	792	1
617	1	335	1
618	1	678	1
619	1	21	0
620	1	443	1
621	1	26	0
622	1	889	1
623	1	203	1
624	1	0	0
625	1	456	1
626	1	732	1
627	1	123	1
628	1	431	1
629	1	7	0
630	1	154	1
631	1	334	1
632	1	156	1
633	1	132	1
634	1	3	0
635	1	33	0
636	1	156	1
637	1	762	1
638	1	432	1
639	1	178	1
640	1	467	1
641	1	7	0
642	1	50	0
643	1	0	0
644	1	43	0
645	1	46	0
646	1	478	1
647	1	335	1
648	1	156	1
649	1	654	1
650	1	23	0
651	1	78	0
652	1	23	0
653	1	0	0
654	1	234	1
655	1	678	1
656	1	234	1
657	1	567	1
658	1	892	1
659	1	6	0
660	1	345	1
661	1	440	1
662	1	89	0
663	1	2	0
664	1	731	1
665	1	234	1
666	1	4	0
667	1	45	0
668	1	31	0
669	1	456	1
670	1	675	1
671	1	453	1
672	1	234	1
673	1	457	1
674	1	123	1
675	1	789	1
676	1	345	1
677	1	23	0
678	1	321	1
679	1	378	1
680	1	39	0
681	1	345	1
682	1	793	1
683	1	126	1
684	1	459	1
685	1	345	1
686	1	709	1
687	1	342	1
688	1	301	1
689	1	304	1
690	1	35	0
691	1	405	1
692	1	235	1
693	1	796	1
694	1	78	0
695	1	456	1
696	1	345	1
697	1	789	1
698	1	341	1
699	1	133	1
700	1	43	0
701	1	478	1
702	1	432	1
703	1	179	1
704	1	25	0
705	1	453	1
706	1	41	0
707	1	342	1
708	1	745	1
709	1	145	1
710	1	38	0
711	1	678	1
712	1	321	1
713	1	567	1
714	1	0	0
715	1	198	1
716	1	456	1
717	1	0	0
718	1	773	1
719	1	845	1
720	1	39	0
721	1	456	1
722	1	223	1
723	1	990	1
724	1	42	0
725	1	543	1
726	1	674	1
727	1	345	1
728	1	222	1
729	1	164	1
730	1	16	0
731	1	359	1
732	1	456	1
733	1	234	1
734	1	31	0
735	1	567	1
736	1	456	1
737	1	10	0
738	1	341	1
739	1	345	1
740	1	897	1
741	1	423	1
742	1	45	0
743	1	341	1
744	1	561	1
745	1	235	1
746	1	61	0
747	1	467	1
748	1	798	1
749	1	345	1
750	1	37	0
751	1	456	1
752	1	397	1
753	1	456	1
754	1	42	0
755	1	123	1
756	1	6	0
757	1	789	1
758	1	345	1
759	1	679	1
760	1	509	1
761	1	3	0
762	1	306	1
763	1	108	1
764	1	102	1
765	1	0	0
766	1	345	1
767	1	7	0
768	1	567	1
769	1	908	1
770	1	607	1
771	1	567	1
772	1	34	0
773	1	679	1
774	1	345	1
775	1	341	1
776	1	234	1
777	1	43	0
778	1	490	1
779	1	347	1
780	1	837	1
781	1	234	1
782	1	53	0
783	1	567	1
784	1	345	1
785	1	78	0
786	1	907	1
787	1	345	1
788	1	609	1
789	1	304	1
790	1	45	0
791	1	389	1
792	1	405	1
793	1	608	1
794	1	732	1
795	1	345	1
796	1	32	0
797	1	231	1
798	1	234	1
799	1	796	1
800	1	15	0
801	1	456	1
802	1	342	1
803	1	237	1
804	1	890	1
805	1	6	0
806	1	487	1
807	1	578	1
808	1	634	1
809	1	32	0
810	1	478	1
811	1	456	1
812	1	432	1
813	1	379	1
814	1	0	0
815	1	678	1
816	1	903	1
817	1	509	1
818	1	788	1
819	1	345	1
820	1	7	0
821	1	567	1
822	1	453	1
823	1	33	0
824	1	678	1
825	1	55	0
826	1	302	1
827	1	0	0
828	1	91	0
829	1	23	0
830	1	345	1
831	1	78	0
832	1	798	1
833	1	432	1
834	1	23	0
835	1	345	1
836	1	790	1
837	1	234	1
838	1	43	0
839	1	321	1
840	1	709	1
841	1	345	1
842	1	234	1
843	1	34	0
844	1	12	0
845	1	706	1
846	1	304	1
847	1	502	1
848	1	731	1
849	1	32	0
850	1	435	1
851	1	667	1
852	1	704	1
853	1	342	1
854	1	567	1
855	1	459	1
856	1	34	0
857	1	509	1
858	1	834	1
859	1	345	1
860	1	678	1
861	1	41	0
862	1	895	1
863	1	576	1
864	1	23	0
865	1	13	0
866	1	41	0
867	1	15	0
868	1	223	1
869	1	556	1
870	1	776	1
871	1	567	1
872	1	451	1
873	1	17	0
874	1	223	1
875	1	567	1
876	1	378	1
877	1	590	1
878	1	304	1
879	1	40	0
880	1	334	1
881	1	561	1
882	1	156	1
883	1	431	1
884	1	123	1
885	1	0	0
886	1	166	1
887	1	231	1
888	1	608	1
889	1	8	0
890	1	334	1
891	1	3	0
892	1	557	1
893	1	890	1
894	1	231	1
895	1	456	1
896	1	312	1
897	1	32	0
898	1	234	1
899	1	567	1
900	1	789	1
901	1	321	1
902	1	507	1
903	1	609	1
904	1	65	0
905	1	405	1
906	1	342	1
907	1	897	1
908	1	234	1
909	1	793	1
910	1	234	1
911	1	567	1
912	1	16	0
913	1	31	0
914	1	453	1
915	1	35	0
916	1	231	1
917	1	345	1
918	1	8	0
919	1	0	0
920	1	23	0
921	1	796	1
922	1	345	1
923	1	678	1
924	1	134	1
925	1	56	0
926	1	890	1
927	1	345	1
928	1	50	0
929	1	345	1
930	1	709	1
931	1	1	0
932	1	607	1
933	1	678	1
934	1	445	1
935	1	43	0
936	1	332	1
937	1	456	1
938	1	809	1
939	1	567	1
940	1	213	1
941	1	56	0
942	1	778	1
943	1	39	0
944	1	332	1
945	1	207	1
946	1	409	1
947	1	567	1
948	1	50	0
949	1	234	1
950	1	678	1
951	1	907	1
952	1	2235	1
953	1	0	0
954	1	889	1
955	1	234	1
956	1	34	0
957	1	567	1
958	1	345	1
959	1	42	0
960	1	890	1
961	1	334	1
962	1	76	0
963	1	556	1
964	1	778	1
965	1	52	0
966	1	990	1
967	1	345	1
968	1	213	1
969	1	345	1
970	1	678	1
971	1	34	0
972	1	908	1
973	1	678	1
974	1	45	0
975	1	809	1
976	1	345	1
977	1	579	1
978	1	28	0
979	1	342	1
980	1	456	1
981	1	667	1
982	1	5	0
983	1	231	1
984	1	456	1
985	1	36	0
986	1	908	1
987	1	321	1
988	1	23	0
989	1	678	1
990	1	334	1
991	1	234	1
992	1	11	0
993	1	908	1
994	1	798	1
995	1	654	1
996	1	48	0
997	1	678	1
998	1	334	1
999	1	56	0
1000	1	29	0
1	0	546	1
2	0	234	1
3	0	678	1
4	0	123	1
5	0	5	0
6	0	234	1
7	0	0	0
8	0	476	1
9	0	23	0
10	0	15	0
11	0	109	1
12	0	1	0
13	0	367	1
14	0	122	1
15	0	478	1
16	0	34	0
17	0	0	0
18	0	0	0
19	0	221	1
20	0	345	1
21	0	234	1
22	0	767	1
23	0	43	0
24	0	103	1
25	0	23	0
26	0	12	0
27	0	206	1
28	0	200	1
29	0	303	1
30	0	12	0
31	0	37	0
32	0	675	1
33	0	0	0
34	0	444	1
35	0	23	0
36	0	333	1
37	0	789	1
38	0	234	1
39	0	44	0
40	0	341	1
41	0	43	0
42	0	203	1
43	0	23	0
44	0	131	1
45	0	31	0
46	0	421	1
47	0	34	0
48	0	49	0
49	0	141	1
50	0	553	1
51	0	0	0
52	0	3	0
53	0	901	1
54	0	401	1
55	0	22	0
56	0	31	0
57	0	9	0
58	0	154	1
59	0	654	1
60	0	0	0
61	0	2230	1
62	0	27	0
63	0	12	0
64	0	3342	1
65	0	223	1
66	0	674	1
67	0	109	1
68	0	42	0
69	0	29	0
70	0	36	0
71	0	461	1
72	0	23	0
73	0	99	0
74	0	31	0
75	0	21	0
76	0	342	1
77	0	15	0
78	0	18	0
79	0	345	1
80	0	31	0
81	0	432	1
82	0	9	0
83	0	0	0
84	0	234	1
85	0	543	1
86	0	0	0
87	0	0	0
88	0	21	0
89	0	45	0
90	0	334	1
91	0	445	1
92	0	567	1
93	0	890	1
94	0	106	1
95	0	108	1
96	0	342	1
97	0	5	0
98	0	6	0
99	0	231	1
100	0	23	0
101	0	123	1
102	0	0	0
103	0	0	0
104	0	13	0
105	0	45	0
106	0	243	1
107	0	342	1
108	0	564	1
109	0	476	1
110	0	103	1
111	0	709	1
112	0	321	1
113	0	154	1
114	0	167	1
115	0	101	1
116	0	430	1
117	0	331	1
118	0	43	0
119	0	8	0
120	0	10	0
121	0	220	1
122	0	34	0
123	0	208	1
124	0	103	1
125	0	0	0
126	0	309	1
127	0	30	0
128	0	33	0
129	0	101	1
130	0	0	0
131	0	0	0
132	0	13	0
133	0	227	1
134	0	0	0
135	0	48	0
136	0	102	1
137	0	43	0
138	0	301	1
139	0	26	0
140	0	41	0
141	0	305	1
142	0	330	1
143	0	12	0
144	0	21	0
145	0	303	1
146	0	0	0
147	0	35	0
148	0	45	0
149	0	103	1
150	0	301	1
151	0	102	1
152	0	43	0
153	0	234	1
154	0	567	1
155	0	430	1
156	0	332	1
157	0	9	0
158	0	45	0
159	0	108	1
160	0	32	0
161	0	45	0
162	0	1	0
163	0	228	1
164	0	101	1
165	0	12	0
166	0	43	0
167	0	607	1
168	0	345	1
169	0	0	0
170	0	234	1
171	0	456	1
172	0	23	0
173	0	45	0
174	0	410	1
175	0	2	0
176	0	90	0
177	0	234	1
178	0	3	0
179	0	112	1
180	0	233	1
181	0	244	1
182	0	0	0
183	0	345	1
184	0	456	1
185	0	348	1
186	0	447	1
187	0	237	1
188	0	567	1
189	0	109	1
190	0	106	1
191	0	431	1
192	0	237	1
193	0	671	1
194	0	209	1
195	0	408	1
196	0	330	1
197	0	12	0
198	0	7	0
199	0	9	0
200	0	554	1
201	0	12	0
202	0	32	0
203	0	203	1
204	0	308	1
205	0	34	0
206	0	41	0
207	0	225	1
208	0	376	1
209	0	340	1
210	0	371	1
211	0	230	1
212	0	347	1
213	0	0	0
214	0	213	1
215	0	22	0
216	0	20	0
217	0	431	1
218	0	231	1
219	0	34	0
220	0	54	0
221	0	37	0
222	0	106	1
223	0	29	0
224	0	430	1
225	0	34	0
226	0	567	1
227	0	0	0
228	0	56	0
229	0	0	0
230	0	432	1
231	0	23	0
232	0	45	0
233	0	31	0
234	0	101	1
235	0	233	1
236	0	378	1
237	0	212	1
238	0	345	1
239	0	103	1
240	0	213	1
241	0	223	1
242	0	409	1
243	0	107	1
244	0	111	1
245	0	230	1
246	0	345	1
247	0	667	1
248	0	123	1
249	0	324	1
250	0	334	1
251	0	567	1
252	0	105	1
253	0	109	1
254	0	309	1
255	0	201	1
256	0	224	1
257	0	267	1
258	0	654	1
259	0	324	1
260	0	456	1
261	0	890	1
262	0	102	1
263	0	340	1
264	0	345	1
265	0	541	1
266	0	231	1
267	0	108	1
268	0	107	1
269	0	356	1
270	0	378	1
271	0	390	1
272	0	209	1
273	0	301	1
274	0	209	1
275	0	609	1
276	0	408	1
277	0	220	1
278	0	334	1
279	0	289	1
280	0	0	0
281	0	234	1
282	0	12	0
283	0	34	0
284	0	40	0
285	0	112	1
286	0	134	1
287	0	203	1
288	0	103	1
289	0	332	1
290	0	456	1
291	0	213	1
292	0	0	0
293	0	6	0
294	0	8	0
295	0	31	0
296	0	45	0
297	0	445	1
298	0	332	1
299	0	0	0
300	0	31	0
301	0	301	1
302	0	4	0
303	0	234	1
304	0	456	1
305	0	0	0
306	0	204	1
307	0	213	1
308	0	10	0
309	0	213	1
310	0	345	1
311	0	60	0
312	0	112	1
313	0	44	0
314	0	67	0
315	0	104	1
316	0	0	0
317	0	401	1
318	0	34	0
319	0	78	0
320	0	204	1
321	0	102	1
322	0	23	0
323	0	46	0
324	0	331	1
325	0	0	0
326	0	221	1
327	0	39	0
328	0	331	1
329	0	0	0
330	0	441	1
331	0	103	1
332	0	67	0
333	0	45	0
334	0	123	1
335	0	234	1
336	0	213	1
337	0	347	1
338	0	338	1
339	0	34	0
340	0	89	0
341	0	609	1
342	0	65	0
343	0	45	0
344	0	13	0
345	0	330	1
346	0	7	0
347	0	445	1
348	0	201	1
349	0	56	0
350	0	234	1
351	0	45	0
352	0	345	1
353	0	456	1
354	0	0	0
355	0	0	0
356	0	234	1
357	0	321	1
358	0	56	0
359	0	43	0
360	0	456	1
361	0	678	1
362	0	704	1
363	0	23	0
364	0	10	0
365	0	311	1
366	0	201	1
367	0	80	0
368	0	4	0
369	0	441	1
370	0	12	0
371	0	221	1
372	0	45	0
373	0	7	0
374	0	265	1
375	0	34	0
376	0	45	0
377	0	5	0
378	0	122	1
379	0	0	0
380	0	654	1
381	0	345	1
382	0	123	1
383	0	107	1
384	0	45	0
385	0	34	0
386	0	2	0
387	0	701	1
388	0	22	0
389	0	550	1
390	0	78	0
391	0	34	0
392	0	345	1
393	0	678	1
394	0	23	0
395	0	122	1
396	0	0	0
397	0	56	0
398	0	660	1
399	0	345	1
400	0	0	0
401	0	123	1
402	0	12	0
403	0	34	0
404	0	556	1
405	0	34	0
406	0	123	1
407	0	334	1
408	0	79	0
409	0	123	1
410	0	8	0
411	0	16	0
412	0	770	1
413	0	409	1
414	0	27	0
415	0	487	1
416	0	3	0
417	0	23	0
418	0	30	0
419	0	445	1
420	0	123	1
421	0	0	0
422	0	0	0
423	0	456	1
424	0	34	0
425	0	109	1
426	0	34	0
427	0	561	1
428	0	23	0
429	0	560	1
430	0	34	0
431	0	112	1
432	0	45	0
433	0	23	0
434	0	709	1
435	0	845	1
436	0	223	1
437	0	123	1
438	0	104	1
439	0	409	1
440	0	406	1
441	0	70	0
442	0	345	1
443	0	21	0
444	0	111	1
445	0	94	0
446	0	23	0
447	0	45	0
448	0	116	1
449	0	45	0
450	0	31	0
451	0	2	0
452	0	114	1
453	0	34	0
454	0	117	1
455	0	56	0
456	0	123	1
457	0	67	0
458	0	432	1
459	0	221	1
460	0	5	0
461	0	608	1
462	0	405	1
463	0	221	1
464	0	109	1
465	0	801	1
466	0	352	1
467	0	23	0
468	0	10	0
469	0	111	1
470	0	45	0
471	0	23	0
472	0	56	0
473	0	445	1
474	0	12	0
475	0	90	0
476	0	30	0
477	0	123	1
478	0	778	1
479	0	509	1
480	0	40	0
481	0	31	0
482	0	123	1
483	0	34	0
484	0	408	1
485	0	309	1
486	0	772	1
487	0	12	0
488	0	1	0
489	0	770	1
490	0	4	0
491	0	231	1
492	0	0	0
493	0	41	0
494	0	50	0
495	0	23	0
496	0	56	0
497	0	221	1
498	0	123	1
499	0	38	0
500	0	67	0
501	0	234	1
502	0	678	1
503	0	112	1
504	0	501	1
505	0	761	1
506	0	134	1
507	0	109	1
508	0	409	1
509	0	33	0
510	0	29	0
511	0	6	0
512	0	112	1
513	0	41	0
514	0	2	0
515	0	0	0
516	0	106	1
517	0	276	1
518	0	4	0
519	0	90	0
520	0	36	0
521	0	32	0
522	0	289	1
523	0	33	0
524	0	27	0
525	0	65	0
526	0	347	1
527	0	209	1
528	0	503	1
529	0	23	0
530	0	45	0
531	0	6	0
532	0	118	1
533	0	23	0
534	0	45	0
535	0	109	1
536	0	3	0
537	0	12	0
538	0	123	1
539	0	489	1
540	0	116	1
541	0	312	1
542	0	5	0
543	0	32	0
544	0	56	0
545	0	509	1
546	0	43	0
547	0	209	1
548	0	65	0
549	0	54	0
550	0	123	1
551	0	0	0
552	0	31	0
553	0	56	0
554	0	70	0
555	0	33	0
556	0	21	0
557	0	45	0
558	0	521	1
559	0	380	1
560	0	60	0
561	0	34	0
562	0	37	0
563	0	89	0
564	0	131	1
565	0	206	1
566	0	633	1
567	0	450	1
568	0	129	1
569	0	341	1
570	0	690	1
571	0	51	0
572	0	23	0
573	0	487	1
574	0	4	0
575	0	345	1
576	0	330	1
577	0	576	1
578	0	233	1
579	0	108	1
580	0	111	1
581	0	333	1
582	0	226	1
583	0	4	0
584	0	2	0
585	0	7	0
586	0	109	1
587	0	1	0
588	0	0	0
589	0	45	0
590	0	21	0
591	0	345	1
592	0	4	0
593	0	113	1
594	0	1	0
595	0	117	1
596	0	3	0
597	0	103	1
598	0	106	1
599	0	2	0
600	0	136	1
601	0	2	0
602	0	3	0
603	0	116	1
604	0	6	0
605	0	89	0
606	0	65	0
607	0	334	1
608	0	5	0
609	0	3	0
610	0	161	1
611	0	0	0
612	0	123	1
613	0	56	0
614	0	78	0
615	0	117	1
616	0	245	1
617	0	5	0
618	0	8	0
619	0	169	1
620	0	1	0
621	0	2	0
622	0	34	0
623	0	176	1
624	0	351	1
625	0	345	1
626	0	209	1
627	0	367	1
628	0	139	1
629	0	342	1
630	0	120	1
631	0	7	0
632	0	0	0
633	0	561	1
634	0	23	0
635	0	15	0
636	0	54	0
637	0	245	1
638	0	241	1
639	0	2	0
640	0	21	0
641	0	234	1
642	0	135	1
643	0	67	0
644	0	789	1
645	0	311	1
646	0	7	0
647	0	4	0
648	0	456	1
649	0	3	0
650	0	1	0
651	0	577	1
652	0	35	0
653	0	456	1
654	0	211	1
655	0	678	1
656	0	7	0
657	0	543	1
658	0	5	0
659	0	3	0
660	0	74	0
661	0	211	1
662	0	32	0
663	0	89	0
664	0	211	1
665	0	13	0
666	0	45	0
667	0	246	1
668	0	7	0
669	0	495	1
670	0	216	1
671	0	15	0
672	0	7	0
673	0	9	0
674	0	357	1
675	0	3	0
676	0	7	0
677	0	457	1
678	0	316	1
679	0	34	0
680	0	23	0
681	0	144	1
682	0	3	0
683	0	58	0
684	0	244	1
685	0	24	0
686	0	2	0
687	0	4	0
688	0	179	1
689	0	35	0
690	0	3	0
691	0	344	1
692	0	142	1
693	0	2	0
694	0	2	0
695	0	1	0
696	0	345	1
697	0	45	0
698	0	268	1
699	0	4	0
700	0	3	0
701	0	23	0
702	0	601	1
703	0	12	0
704	0	454	1
705	0	12	0
706	0	56	0
707	0	2	0
708	0	432	1
709	0	467	1
710	0	131	1
711	0	107	1
712	0	235	1
713	0	134	1
714	0	310	1
715	0	331	1
716	0	346	1
717	0	401	1
718	0	114	1
719	0	3	0
720	0	86	0
721	0	5	0
722	0	345	1
723	0	235	1
724	0	5	0
725	0	4	0
726	0	3	0
727	0	0	0
728	0	108	1
729	0	234	1
730	0	242	1
731	0	562	1
732	0	353	1
733	0	222	1
734	0	245	1
735	0	56	0
736	0	356	1
737	0	2	0
738	0	62	0
739	0	11	0
740	0	345	1
741	0	301	1
742	0	107	1
743	0	241	1
744	0	14	0
745	0	14	0
746	0	22	0
747	0	252	1
748	0	25	0
749	0	177	1
750	0	53	0
751	0	6	0
752	0	143	1
753	0	34	0
754	0	13	0
755	0	108	1
756	0	32	0
757	0	3	0
758	0	9	0
759	0	366	1
760	0	341	1
761	0	106	1
762	0	133	1
763	0	311	1
764	0	245	1
765	0	109	1
766	0	43	0
767	0	67	0
768	0	23	0
769	0	23	0
770	0	65	0
771	0	8	0
772	0	232	1
773	0	45	0
774	0	23	0
775	0	211	1
776	0	31	0
777	0	1	0
778	0	112	1
779	0	21	0
780	0	121	1
781	0	12	0
782	0	4	0
783	0	23	0
784	0	435	1
785	0	309	1
786	0	134	1
787	0	232	1
788	0	112	1
789	0	154	1
790	0	212	1
791	0	223	1
792	0	567	1
793	0	234	1
794	0	211	1
795	0	678	1
796	0	33	0
797	0	54	0
798	0	67	0
799	0	14	0
800	0	456	1
801	0	34	0
802	0	304	1
803	0	34	0
804	0	23	0
805	0	11	0
806	0	14	0
807	0	69	0
808	0	187	1
809	0	345	1
810	0	231	1
811	0	456	1
812	0	121	1
813	0	0	0
814	0	34	0
815	0	1434	1
816	0	23	0
817	0	3	0
818	0	2	0
819	0	546	1
820	0	46	0
821	0	302	1
822	0	23	0
823	0	43	0
824	0	76	0
825	0	4	0
826	0	22	0
827	0	56	0
828	0	3	0
829	0	5	0
830	0	457	1
831	0	235	1
832	0	3	0
833	0	23	0
834	0	251	1
835	0	142	1
836	0	234	1
837	0	34	0
838	0	43	0
839	0	545	1
840	0	343	1
841	0	23	0
842	0	32	0
843	0	522	1
844	0	54	0
845	0	341	1
846	0	53	0
847	0	3	0
848	0	344	1
849	0	32	0
850	0	23	0
851	0	8	0
852	0	196	1
853	0	23	0
854	0	232	1
855	0	114	1
856	0	654	1
857	0	465	1
858	0	32	0
859	0	1	0
860	0	21	0
861	0	765	1
862	0	3	0
863	0	858	1
864	0	34	0
865	0	21	0
866	0	578	1
867	0	789	1
868	0	5	0
869	0	346	1
870	0	34	0
871	0	21	0
872	0	57	0
873	0	163	1
874	0	9	0
875	0	186	1
876	0	135	1
877	0	678	1
878	0	432	1
879	0	211	1
880	0	107	1
881	0	154	1
882	0	537	1
883	0	342	1
884	0	841	1
885	0	123	1
886	0	433	1
887	0	577	1
888	0	346	1
889	0	853	1
890	0	32	0
891	0	74	0
892	0	44	0
893	0	124	1
894	0	657	1
895	0	35	0
896	0	8	0
897	0	542	1
898	0	13	0
899	0	322	1
900	0	43	0
901	0	643	1
902	0	12	0
903	0	764	1
904	0	23	0
905	0	342	1
906	0	23	0
907	0	7	0
908	0	345	1
909	0	709	1
910	0	459	1
911	0	356	1
912	0	124	1
913	0	123	1
914	0	605	1
915	0	22	0
916	0	232	1
917	0	34	0
918	0	124	1
919	0	0	0
920	0	4	0
921	0	3	0
922	0	323	1
923	0	4	0
924	0	4	0
925	0	2	0
926	0	123	1
927	0	2	0
928	0	234	1
929	0	12	0
930	0	123	1
931	0	3	0
932	0	324	1
933	0	235	1
934	0	23	0
935	0	235	1
936	0	164	1
937	0	367	1
938	0	322	1
939	0	401	1
940	0	132	1
941	0	7	0
942	0	4	0
943	0	34	0
944	0	32	0
945	0	54	0
946	0	34	0
947	0	467	1
948	0	23	0
949	0	8	0
950	0	45	0
951	0	236	1
952	0	456	1
953	0	165	1
954	0	34	0
955	0	2	0
956	0	452	1
957	0	14	0
958	0	4	0
959	0	124	1
960	0	548	1
961	0	46	0
962	0	34	0
963	0	235	1
964	0	9	0
965	0	175	1
966	0	34	0
967	0	3	0
968	0	5	0
969	0	7	0
970	0	96	0
971	0	456	1
972	0	311	1
973	0	45	0
974	0	32	0
975	0	531	1
976	0	411	1
977	0	132	1
978	0	431	1
979	0	234	1
980	0	189	1
981	0	581	1
982	0	179	1
983	0	3	0
984	0	14	0
985	0	12	0
986	0	193	1
987	0	12	0
988	0	52	0
989	0	12	0
990	0	165	1
991	0	454	1
992	0	67	0
993	0	21	0
994	0	12	0
995	0	35	0
996	0	689	1
997	0	124	1
998	0	134	1
999	0	124	1
[truncated: 501 more rows]
